# Supplementary material
Source: HighWire-hosted journal article supplement (https://jnnp.bmj.com/content/94/6/482)
Supplement: inline-supplementary-material-1 [file inline-supplementary-material-1.pdf]

**Supplementary appendix****The NEXT-MS study group:**

| <b>Name</b>        | <b>Affiliation</b>                                                                                                                                                                                                                                                                                                                                                                                                                                                            |
|--------------------|-------------------------------------------------------------------------------------------------------------------------------------------------------------------------------------------------------------------------------------------------------------------------------------------------------------------------------------------------------------------------------------------------------------------------------------------------------------------------------|
| E.P.J. Arnoldus    | Department of Neurology, Elisabeth TweeSteden Hospital, Tilburg, The Netherlands                                                                                                                                                                                                                                                                                                                                                                                              |
| F. Barkhof         | Department of Radiology and Nuclear Medicine, Amsterdam University Medical Centers, Vrije Universiteit Amsterdam, Amsterdam Neuroscience, MS Center Amsterdam, Amsterdam, the Netherlands; Queen Square MS Center, Department of Neuroinflammation, UCL Institute of Neurology, Faculty of Brain Sciences, University College London, UK; and National Institute for Health Research (NIHR) University College London Hospitals (UCLH) Biomedical Research Center, London, UK |
| W.H. Bouvy         | Department of Neurology, Diakonessenhuis Hospital, Utrecht, The Netherlands                                                                                                                                                                                                                                                                                                                                                                                                   |
| G.W. van Dijk      | Department of Neurology, Canisius Wilhelmina Hospital, Nijmegen, The Netherlands                                                                                                                                                                                                                                                                                                                                                                                              |
| J.J.J. van Eijk    | Department of Neurology, Jeroen Bosch Hospital, 's Hertogenbosch, The Netherlands                                                                                                                                                                                                                                                                                                                                                                                             |
| M. Eurelings       | Department of Neurology, Spaarne Gasthuis, Haarlem, The Netherlands                                                                                                                                                                                                                                                                                                                                                                                                           |
| J. van Genugten    | Department of Neurology, Ziekenhuisgroep Twente Hospital, Hengelo, The Netherlands                                                                                                                                                                                                                                                                                                                                                                                            |
| E. Hoitsma         | Department of Neurology, MS Center Alrijne Hospital, Leiden, The Netherlands                                                                                                                                                                                                                                                                                                                                                                                                  |
| E.L.J. Hoogervorst | Department of Neurology, St Antonius Hospital, Utrecht, The Netherlands                                                                                                                                                                                                                                                                                                                                                                                                       |
| B.A. de Jong       | Department of Neurology, MS Center Amsterdam, Amsterdam University Medical Centers, Vrije Universiteit Amsterdam, Amsterdam Neuroscience, Amsterdam, The Netherlands                                                                                                                                                                                                                                                                                                          |
| N.F. Kalkers       | Department of Neurology, OLVG, Amsterdam, The Netherlands                                                                                                                                                                                                                                                                                                                                                                                                                     |
| Z.L.E. van Kempen  | Department of Neurology, MS Center Amsterdam, Amsterdam University Medical Centers, Vrije Universiteit Amsterdam, Amsterdam Neuroscience, Amsterdam, The Netherlands                                                                                                                                                                                                                                                                                                          |

|                       |                                                                                                                                                                                                                                                                      |
|-----------------------|----------------------------------------------------------------------------------------------------------------------------------------------------------------------------------------------------------------------------------------------------------------------|
| J. Killestein         | Department of Neurology, MS Center Amsterdam, Amsterdam University Medical Centers, Vrije Universiteit Amsterdam, Amsterdam Neuroscience, Amsterdam, The Netherlands                                                                                                 |
| M.E. Kloosterziel     | Department of Neurology, Wilhelmina Hospital, Assen, The Netherlands                                                                                                                                                                                                 |
| J.J. Kragt            | Department of Neurology, Reinier de Graaf Hospital, Delft, The Netherlands                                                                                                                                                                                           |
| Z.Y.G.J. van Lierop   | Department of Neurology, MS Center Amsterdam, Amsterdam University Medical Centers, Vrije Universiteit Amsterdam, Amsterdam Neuroscience, Amsterdam, The Netherlands                                                                                                 |
| B.I. Lissenberg-Witte | Department of Epidemiology and Data Science, Amsterdam University Medical Centers, Vrije Universiteit Amsterdam, Amsterdam, The Netherlands                                                                                                                          |
| B. Moraal             | Department of Radiology and Nuclear Medicine, Amsterdam University Medical Centers, Vrije Universiteit Amsterdam, Amsterdam Neuroscience, MS Center Amsterdam, Amsterdam, the Netherlands.                                                                           |
| J.P. Mostert          | Department of Neurology, Rijnstate Hospital, Arnhem, The Netherlands                                                                                                                                                                                                 |
| C.E.P. van Munster    | Department of Neurology, Amphia, Breda, The Netherlands                                                                                                                                                                                                              |
| J. Nielsen            | Department of Neurology, Ommelander Hospital, Scheemda, The Netherlands                                                                                                                                                                                              |
| B.W. van Oosten       | Department of Neurology, MS Center Amsterdam, Amsterdam University Medical Centers, Vrije Universiteit Amsterdam, Amsterdam Neuroscience, Amsterdam, The Netherlands                                                                                                 |
| T. Rispens            | Department of Immunopathology, Sanquin Research, Amsterdam, The Netherlands, and Landsteiner Laboratory, Academic Medical Center, University of Amsterdam, Amsterdam, The Netherlands; Biologics Laboratory, Sanquin Diagnostic Services, Amsterdam, The Netherlands |
| L.C. van Rooij        | Department of Neurology, Maasstad Hospital, Rotterdam, The Netherlands                                                                                                                                                                                               |
| C.M. Rosendaal        | Department of Neurology, Slingeland Hospital, Doetinchem, The Netherlands                                                                                                                                                                                            |
| L.G.F. Sinnige        | Department of Neurology, Medisch Centrum Leeuwarden, Leeuwarden, The Netherlands                                                                                                                                                                                     |

|                   |                                                                                                                                                                      |
|-------------------|----------------------------------------------------------------------------------------------------------------------------------------------------------------------|
| E.M.M. Strijbis   | Department of Neurology, MS Center Amsterdam, Amsterdam University Medical Centers, Vrije Universiteit Amsterdam, Amsterdam Neuroscience, Amsterdam, The Netherlands |
| A.A. Toorop       | Department of Neurology, MS Center Amsterdam, Amsterdam University Medical Centers, Vrije Universiteit Amsterdam, Amsterdam Neuroscience, Amsterdam, The Netherlands |
| B.M.J. Uitdehaag  | Department of Neurology, MS Center Amsterdam, Amsterdam University Medical Centers, Vrije Universiteit Amsterdam, Amsterdam Neuroscience, Amsterdam, The Netherlands |
| A. Vennegoor      | Department of Neurology, Flevoziekenhuis, Almere The Netherlands                                                                                                     |
| B.H.A. Wokke      | Department of Neurology, ErasMS, Erasmus Medical Center, Rotterdam, The Netherlands                                                                                  |
| E.M.P.E. Zeinstra | Department of Neurology, Isala, Meppel, The Netherlands                                                                                                              |
